# Supplementary material for: Phytochemical Investigation of Egyptian Riverhemp: A Potential Source of Antileukemic Metabolites
Source: Hindawi journal article supplement (doi:10.1155/2022/8766625), 2022-08-29
Supplement: f1 [file 8766625.f1.docx]

**SUPPLEMENTARY MATERIAL**

**Phytochemical Investigation of Egyptian Riverhemp: a potential source of antileukemic metabolites**

Shimaa M. Abdelgawad 1, 2, Mona H. Hetta 2, Mohamed A. Ibrahim 1, Premalatha Balachandran 1, Jin Zhang 1, Mei Wang 3, Wagdy M. Eldehna 4, 5, Ghada A. Fawzy 6*, Hesham I. El-Askary 6 and Samir A. Ross 1, 7*

*1 National Center for Natural Products Research, Research Institute of Pharmaceutical Sciences, School of Pharmacy, University of Mississippi, University, Mississippi 38677, United States.*

*2 Pharmacognosy Department, Faculty of Pharmacy, Fayoum University, 63514, Egypt.*

3 *National Center for Natural Products Research, Agricultural Research Service, United States Department of Agriculture, University, MS, 38677, USA.*

*4 School of Biotechnology, Badr University in Cairo, Badr City, 11829, Egypt*

*5 Department of Pharmaceutical Chemistry, Faculty of Pharmacy, Kafrelsheikh University, Kafrelsheikh,* *33516, Egypt*

*6 Pharmacognosy Department, Faculty of Pharmacy, Cairo University, 11562, Egypt.*

*7 Biomolecular Sciences, Division of Pharmacognosy, School of Pharmacy, University of Mississippi, 38677, United States.*

**General Experimental Procedures**

LC analysis was conducted using an Agilent 1100 HPLC system equipped with a degasser (G1379A), quaternary pump (G13311A), auto sampler (G1313A), column oven (G1316A), and UV-Diode detector (G1315B) controlled by Chemstation software. Analysis of the fractions was carried out on an RP-C18 column (150×4.6 mm; particle size 5 μm; Luna) with column oven temperature set to 25 °C and a gradient system of eluent water (A) and methanol (B) used. The gradient condition was as follows: 0–**8** min (**30**% B), **9–11** min (**40**% B→**8**0% B), **12–15** min (100% B). The flow rate of the solvent was 2.0 mL/min, and the injection volume was 50μL. All the analysis was carried out at wavelength of 256 nm with a run time of **16** min. HPLC-grade methanol and water solvents were used. Acetic acid was added as a modifier to achieve a final concentration of 0.1% in each solvent.

Gas Chromatography – Mass Spectroscopic (GC-MS) analysis of fatty acid methyl esters (FAME) and unsaponifiable fractions of *n*-hexane extractives was performed with an Aglient 7890B gas chromatograph equipped with an Aglient mass spectrometric detector 5977A, with a direct capillary interface and fused silica capillary column HP-5MS (30 m × 320 μm × 0.25 µm film thickness). Samples were injected under the following conditions: Helium was used as carrier gas at approximately 1 mL/min., pulsed split less mode. The injection size was 1 µL. The GC temperature program was started at 65 °C (3 min) then elevated to 280 °C, at rate of 4 °C/min. then held at 280 °C for 20 min. Wiley7 Nist014 L mass spectral data base was used in the identification of the separated peaks.

**Tables**

| **Table S1 Results of GC/MS analysis of fatty acid methyl ester (FAME) of the *n*-hexane fraction of *SS* leaves** | | | | |
| --- | --- | --- | --- | --- |
| **Compound No.** | **Compound Name** | **RT (min)** | **Mol Weight (amu)** | **Peak area (%)** |
|  | Nonanoic acid, 9-oxo-, methyl ester | 22.3 | 186.13 | 0.8 |
|  | Methyl myristate | 27.8 | 242.23 | 1.1 |
|  | Neophytadiene * | 30.0 | 278.29 | 3.0 |
|  | Methyl palmitate | 33.1 | 270.26 | 16.6 |
|  | Cyclotetradecanolide | 33.3 | 226.19 | 2.3 |
|  | Ethyl palmitate | 34.5 | 284.27 | 4.0 |
|  | E-11-Hexadecenoic acid, ethyl ester * | 34.7 | 282.26 | 0.8 |
|  | Methyl margarate | 35.4 | 284.27 | 0.9 |
|  | Methyl elaidate * | 37.5 | 296.27 | 4.5 |
|  | Methyl lineoleate * | 37.8 | 294.26 | 10.8 |
|  | Methyl stearate | 37.9 | 298.29 | 3.5 |
|  | Methyl linolenate * | 38.4 | 292.24 | 23.7 |
|  | Ethyl stearate | 39.1 | 312.30 | 3.3 |
|  | Ethyl linolenate * | 39.6 | 306.26 | 6.8 |
|  | Methyl arachidate | 42.1 | 326.32 | 1.0 |
|  | Methyl behenate | 46.1 | 354.35 | 0.9 |
| **Saturated Fatty acids** | | | | 34.4 % |
| **Unsaturated fatty acids** | | | | 49.6 % |
| **Unidentified compounds** | | | | 16 % |

*Unsaturated fatty acids

| **Table S2 Results of GC/MS analysis of Unsaponifiable matter of the *n*-hexane fraction of *SS* leaves** | | | | |
| --- | --- | --- | --- | --- |
| **Compound No.** | **Compound Name** | **RT (min)** | **Mol Weight (amu)** | **Peak area (%)** |
|  | Dodecyl acrylate * | 27.0 | 240.21 | 1.0 |
|  | Phytone * | 30.7 | 268.28 | 4.2 |
|  | Loliolid | 34.8 | 196.11 | 5.7 |
|  | Phytol * | 37.2 | 296.31 | 14.0 |
|  | Neophytadiene * | 38.0 | 278.29 | 0.6 |
|  | Z-14-Nonacosane * | 39.2 | 406.45 | 0.3 |
|  | Heptacos-1-ene * | 39.4 | 378.42 | 0.4 |
|  | Stigmasta-5,22-dien-3-ol, acetate, (3. beta, 22 Z) | 47.0 | 454.38 | 11.0 |
|  | Stigmastan-3, 5, 22-trien | 47.2 | 394.36 | 19.7 |
|  | Stigmasta-3, 5-diene | 52.6 | 396.38 | 9.2 |
|  | 4-epi-Dehydroabietinol acetate | 54.5 | 328.24 | 3.7 |
|  | Stigmasterol | 66.1 | 412.37 | 6.0 |
| **Total hydrocarbons** | | | | 20.5 % |
| **Steroids** | | | | 55.3 % |
| **Unidentified compounds** | | | | 24.2 % |

*Hydrocarbons

| **Table S3 List of compounds isolated from *Sesbania sesban* L. leaves** | | | | |  |
| --- | --- | --- | --- | --- | --- |
| **Compound No.** | **Class of compound** | **Compound name** | **Fraction** | **Characterization and structure elucidation** | **References** |
| **1** | Fatty alcohol. | Phytol. | *n*-Hexane | 1H-NMR, DEPTQ-135, HMQC, HMBC and HRMS. | [1] |
| **2** | Sterol. | Stigmasterol. | *n*-Hexane | 1H-NMR, 13C-NMR, DEPT-135, HSQC, HMQC, HMBC and HRMS. | [2] |
| **3** | Triterpene lactone. | Liquidambaric lactone. | Ethyl acetate | 1H-NMR, APT, HSQC, HMBC and HRMS. | [3] |
| **4** | Triterpene lactone. | Maslinic lactone. | Ethyl acetate | 1H-NMR, DEPTQ-135, HSQC, HMBC and HRMS. | [4] |
| **5** | Triterpene. | Oleanolic acid. | Ethyl acetate | 1H-NMR, 13C-NMR, DEPT-135, HSQC, HMBC and HRMS. | [5] |
| **6** | Triterpene lactone. | 11*α*,12*α*-Epoxy-oleanolic lactone. | Ethyl acetate | 1H-NMR, 13C-NMR, HMQC, HMBC and HRMS. | [6] |
| **7** | Triterpene lactone. | Oleanderolide. | Ethyl acetate | 1H-NMR, APT, HSQC, HMBC and HRMS. | [7] |
| **8** | Saponin. | Stigmasterol glucoside. | Ethyl acetate | 1H-NMR, APT, HMQC, HMBC and HRMS. | [8] |
| **9** | Phenolic compound. | *P*-aminophenol. | Ethyl acetate | 1H-NMR, DEPTQ-135, HMQC, HMBC and HRMS. | [9] |
| **10** | Flavonoid glycoside. | Quercetin-3-*O*-rhamnopyranoside. | Ethyl acetate | 1H-NMR, DEPTQ-135, HMQC, HMBC and HRMS. | [10] |
| **11** | Flavonoid glycoside. | Quercetin-3-*O*-glucopyranoside. | Ethyl acetate | 1H-NMR, DEPTQ-135, HMQC, HMBC and HRMS. | [10] |
| **12** | Flavonoid glycoside. | Quercetin-3-*O*-*α*-arabinoside. | Ethyl acetate | 1H-NMR, APT, HSQC, HMBC and HRMS. | [11] |
| **13** | Flavonoid glycoside. | Quercetin-3-*O*-*β*-xyloside. | Ethyl acetate | 1H-NMR, APT, HSQC, HMBC and HRMS. | [11] |
| **14** | Flavonoid glycoside. | Mauritianin. | Ethyl acetate | 1H-NMR, 13C-NMR, DEPTQ-135, APT, DEPT-135, HSQC, HMQC, HMBC and HRMS. | [12] |
| **15** | Flavonoid glycoside. | Isorhamnetin 3-*O*-(2,6-di-*O*-*α*-rhamnosyl)-*β*-galactopyranoside. | Ethyl acetate | 1H-NMR, APT, HSQC, HMBC and HRMS. | [13], |
| **16** | Flavonoid glycoside. | Clitorin. | Ethyl acetate | 1H-NMR, APT, HSQC, HMBC and HRMS. | [14] |
| **17** | Flavonoid glycoside. | 3-[(*O*-6-Deoxy-*α*-L-manno-pyranosyl-(1→2)-*O*-[6-deoxy-*α*-L-mannopyranosyl-(1→6)]-*β*-D-glucopyranosyl) oxy]-5,7-dihydroxy-2-(3-hydroxy-4-methoxyphenyl)-4H-1-benzopyran-4-one. | Ethyl acetate | 1H-NMR, APT, HSQC, HMBC and HRMS. | [15] |
| **18** | Flavonoid glycoside. | Kaempferol 3-*O*-*α*-l-rhamno-pyranosyl (1→2) [*α*-l-rhamno-pyranosyl(1→6)] -(4-*O*-E-*p*-coumaroyl-*β*-d-galacto-pyranoside). | Ethyl acetate | 1H-NMR, APT, HSQC, HMBC, TOCSY and HRMS. | [16] |
| **19** | Triterpene. | Betulinic acid. | Aqueous | 1H-NMR, 13C-NMR, HMQC, HMBC and HRMS. | [5, 17] |
| **20** | Triterpene. | Ursolic acid. | Aqueous | 1H-NMR, DEPTQ-135, HMQC, HMBC and HRMS. | [18] |
| **21** | Triterpene. | 3*β*-*O*-(*cis*-*p*-Coumaroyl)-2*α*-hydroxyurs-12-en-28-oic acid. | Aqueous | 1H-NMR, DEPTQ-135, HMQC, HMBC and HRMS. | [19] |
| **22** | Triterpene. | 3*β*-*O*-(*trans*-*p*-Coumaroyl)-2*α*-hydroxyurs-12-en-28-oic acid (known as Jacoumaric acid). | Aqueous | 1H-NMR, DEPTQ-135, HMQC, HMBC and HRMS. | [19] |
| **23** | Triterpene. | Obtuslin. | Aqueous | 1H-NMR, APT, HSQC, HMBC and HRMS. | [18] |
| **24** | Triterpene. | Corosolic acid. | Aqueous | 1H-NMR, DEPTQ-135, HSQC, HMBC and HRMS. | [19] |
| **25** | Saponin. | *β*-Sitosterol glucoside. | Aqueous | 1H-NMR, APT, HMQC, HMBC and HRMS. | [20] |
| **26** | Saponin. | Hederagenin 3-*O*-*β*-D-glucuronopyranoside 6`-*O*-methyl ester. | Aqueous | 1H-NMR, APT, HSQC, HMBC and HRMS. | [21] |
| **27** | Flavonoid glycoside. | Kaempferol-3-*O*-rutinoside. | Aqueous | 1H-NMR, DEPTQ-135, HSQC, HMBC and HRMS. | [22] |
| **28** | Flavonoid glycoside. | Isorhamentin-3-*O*-rutinoside. | Aqueous | 1H-NMR, DEPTQ-135, HMQC, HMBC and HRMS. | [23] |
| **29** | Triterpene. | Hederagenin 3-*O*-*β*-D-glucuronopyranoside. | Aqueous | 1H-NMR, DEPTQ-135, HMQC, HMBC and HRMS. | [21] |
| **30** | Triterpene. | Ketocorosolic acid. | Aqueous | 1H-NMR, APT, HMQC, HMBC and HRMS. | [24] |
| **31** | Triterpene. | Hederagenin. | Aqueous | 1H-NMR, APT, HMQC, HMBC and HRMS. | [25] |
| **32** | Saponin. | Oleanolic acid 3-*O*-*β*-D-glucuronopyranoside 6`methyl ester. | Aqueous | 1H-NMR, DEPTQ-135, HMQC, HMBC and HRMS. | [26] |
| **33** | Saponin. | Hederatriol 3-*O*-*β*-D-glucuronic acid methyl ester. | Aqueous | 1H-NMR, APT, DEPT-135, HSQC, HMBC, TOCSY and HRMS. | New |
| **34** | Saponin. | Oleanolic acid 3-*O*-*β*-D-glucuronopyranoside. | Aqueous | 1H-NMR, 13C-NMR, HMQC, HMBC and HRMS. | [27] |
| **35** | Saponin. | Chikusetsusaponin II. | Aqueous | 1H-NMR, 13C-NMR, DEPT-135, HSQC, HMBC and HRMS. | [28] |

**Captions of Figures**

Fig. S1: HPLC (RP column) purification of compounds (14) and (15) using MeOH/water gradient.

Fig. S2: HPLC (RP column) purification of compounds (16) and (17) using MeOH/water gradient.

Fig. S 3: HPLC (RP column) purification of compounds (27) and (28) using MeOH/water gradient.

Fig. S4: Chemical structures of compounds isolated from *SS* leaves.

Fig. S5: 1HNMR spectrum of compound (33).

Fig. S6: deptq135 spectrum of compound (33).

Fig. S7: dept spectrum of compound (33).

Fig. S8: HSQC spectrum of compound (33).

Fig. S9: TOCSY spectrum of compound (33).

Fig. S10: TOCSY spectrum of compound (33).

Fig. S11: ESI (-) MS spectrum of Compound (33).

Fig. S12: Bioguided screening of EtOAc (Fr-B) column subfractions against leukemia K562 cell line.

Fig. S13: Bioguided screening of Fr-B-2 column subfractions and Fr-B-5 column subfractions against leukemia K562 cell line.

Fig. S14: Bioguided screening of Aqueous (Fr-C) column subfractions against leukemia K562 cell line.

Fig. S15: Bioguided screening of Fr-C-5 column subfractions against leukemia K562 cell line.


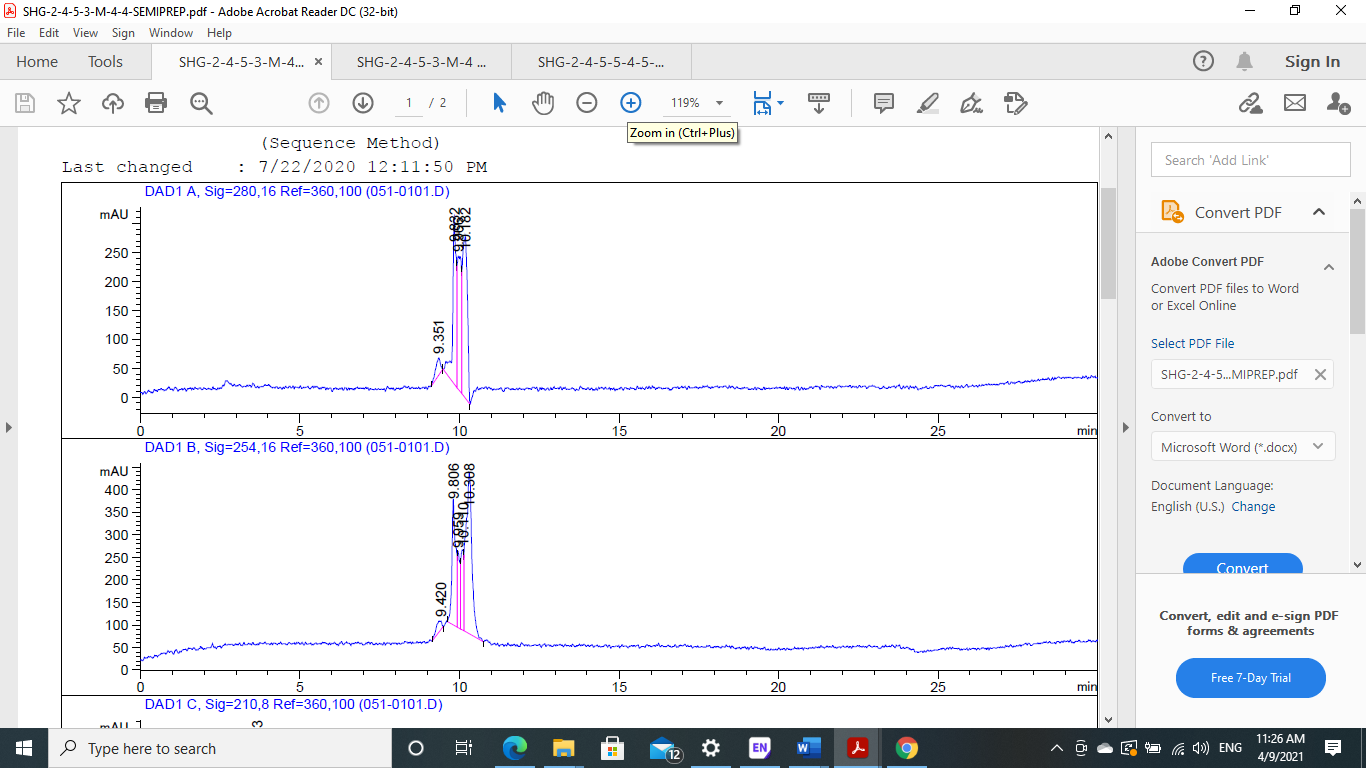


Fig. S1 HPLC (RP column) purification of compounds (14) and (15) using MeOH/water gradient.


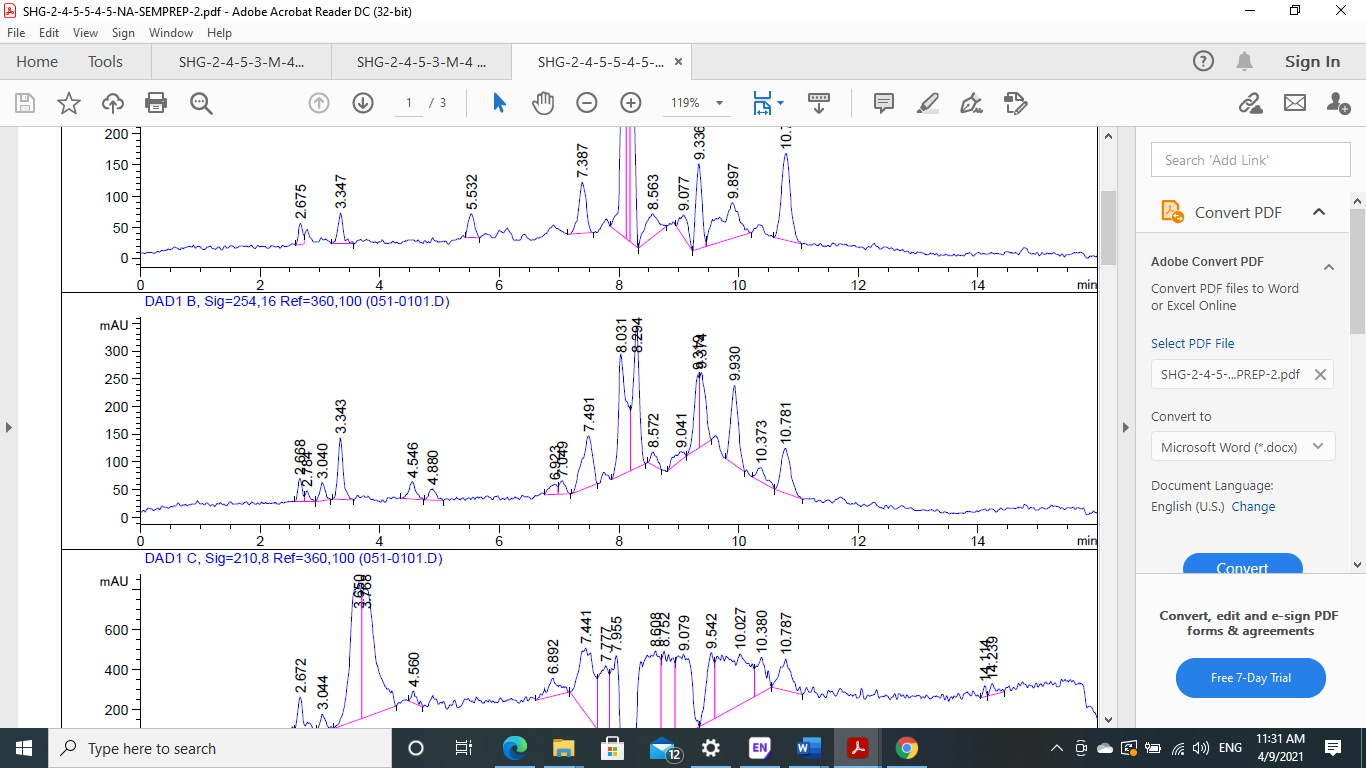


Fig. S2 HPLC (RP column) purification of compounds (16) and (17) using MeOH/water gradient.

**
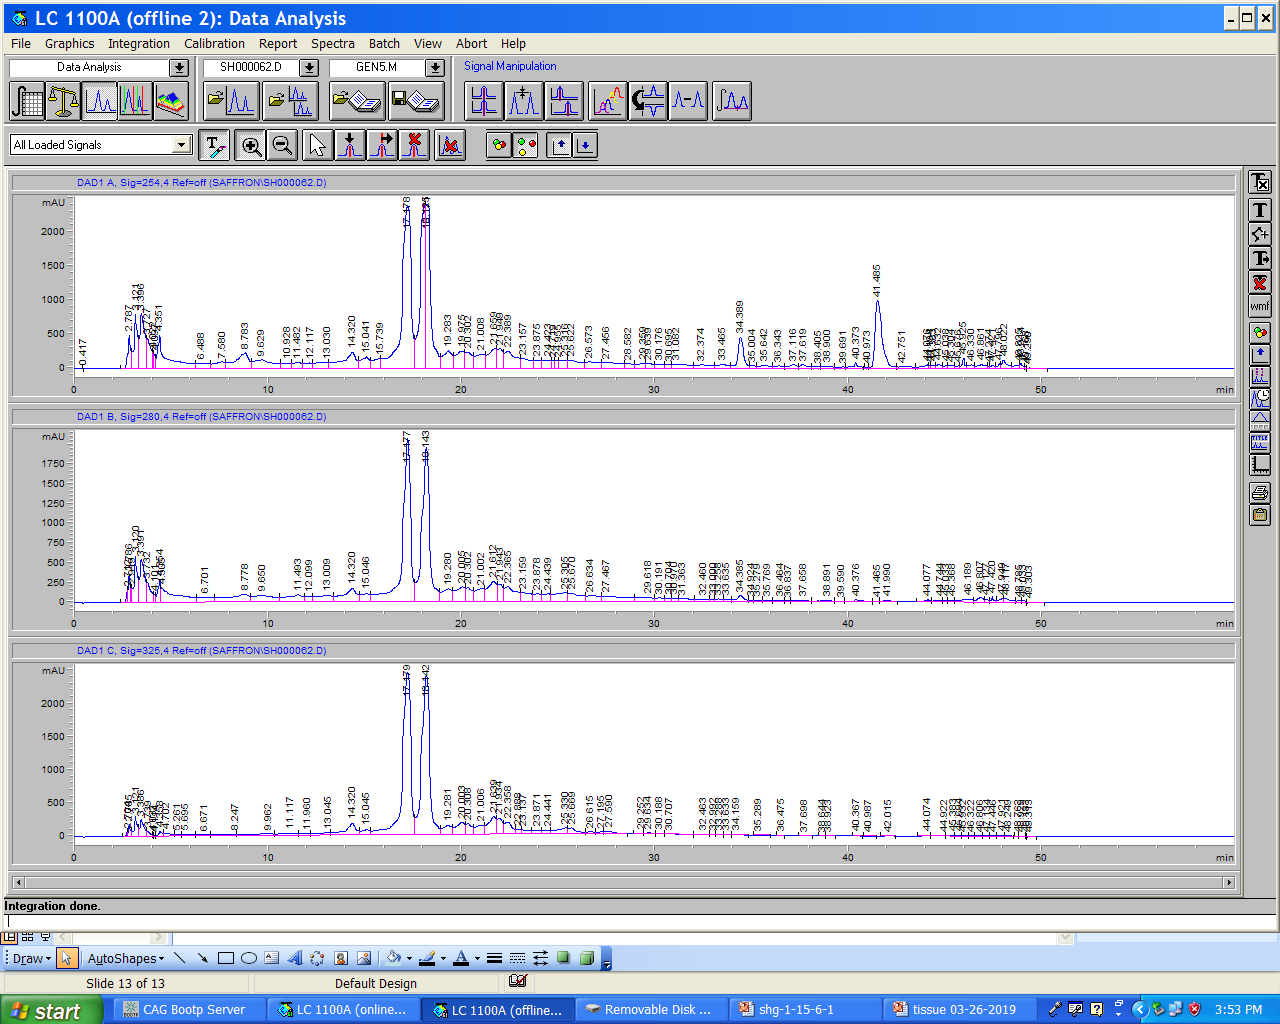
**

Fig. S3 HPLC (RP column) purification of compounds (27) and (28) using MeOH/water gradient

| **1** | **R 1 R 2**  **4** H OH  **7** OH H    **R**  **3** C=O  **6** OH | **R 1 R *2* R 3**  **20** H H H  **21** H OH*E*-*p*-coumaric acid  **22** H OH*Z*-*p*-coumaric acid  **23** C=O H H  **24** H OH H  **30** C=O OH H |
| --- | --- | --- |
| **R Δ 22, 23**  **2**  H CH=CH  **8** β-D-glucopyranoside CH=CH  **25** β-D-glucopyranoside CH2-CH2 |

**Fig.S4 Chemical structures of compounds isolated from *SS* leaves**

| **R 1 R 2 R 3**  **5** CH3  H COOH  **26** CH2OH *β*-D-glucuronopyranoside 6'-*O*-methyl ester COOH  **29** CH2OH *β*-D-glucuronopyranoside COOH  **31** CH2OH H COOH  **32** CH3  *β*-D-glucuronopyranoside 6'-*O*-methyl ester COOH  **33** CH2OH *β*-D-glucuronopyranoside 6'-*O*-methyl ester CH2OH  **34** CH3  *β*-D-glucuronopyranoside COOH  **35** CH3  *β*-D-glucuronopyranoside (6→1) -β-D-glucopyranoside COOH | **19**    **9** |
| --- | --- |

**Fig.S4 Chemical structures of compounds isolated from *SS* leaves (continued)**

| **R 1 R 2 R 3**  **10** OH H *α*-L-rhamnopyranoside  **11** OH H *β*-D-glucopyranoside  **12** OH H *α*-L-arabinoside  **13** OH H *β*-D-xyloside  **14** H H *α*-L-rhamnopyranosyl-(1→ 6)-*O*-[*α*-L-rhamnopyranosyl-(1→2)]-*O*-*β*-D-galactopyranoside  **15** OCH3H*α*-L-rhamnopyranosyl-(1→ 6)-*O*-[*α*-L-rhamnopyranosyl-(1→2)]-*O*-*β*-D-galactopyranoside  **16** H H *α*-L-rhamnopyranosyl-(1→ 6)-*O*-[*α*-L-rhamnopyranosyl-(1→2)]-*O*-*β*-D-glucopyranoside  **17** OHCH3*α*-L-rhamnopyranosyl-(1→ 6)-*O*-[*α*-L-rhamnopyranosyl-(1→2)]-*O*-*β*-D-glucopyranoside  **18** H H *α*-L-rhamnopyranosyl-(1→2) [*α*-L-rhamnopyranosyl-(1→6)] -(4-*O*-E-*p*- coumaroyl- *β*-D-galactopyranoside  **27** H H *β*- rutinosyle  **28** OCH3 H *β*- rutinosyle |
| --- |

**Fig.S4 Chemical structures of compounds isolated from *SS* leaves (continued)**


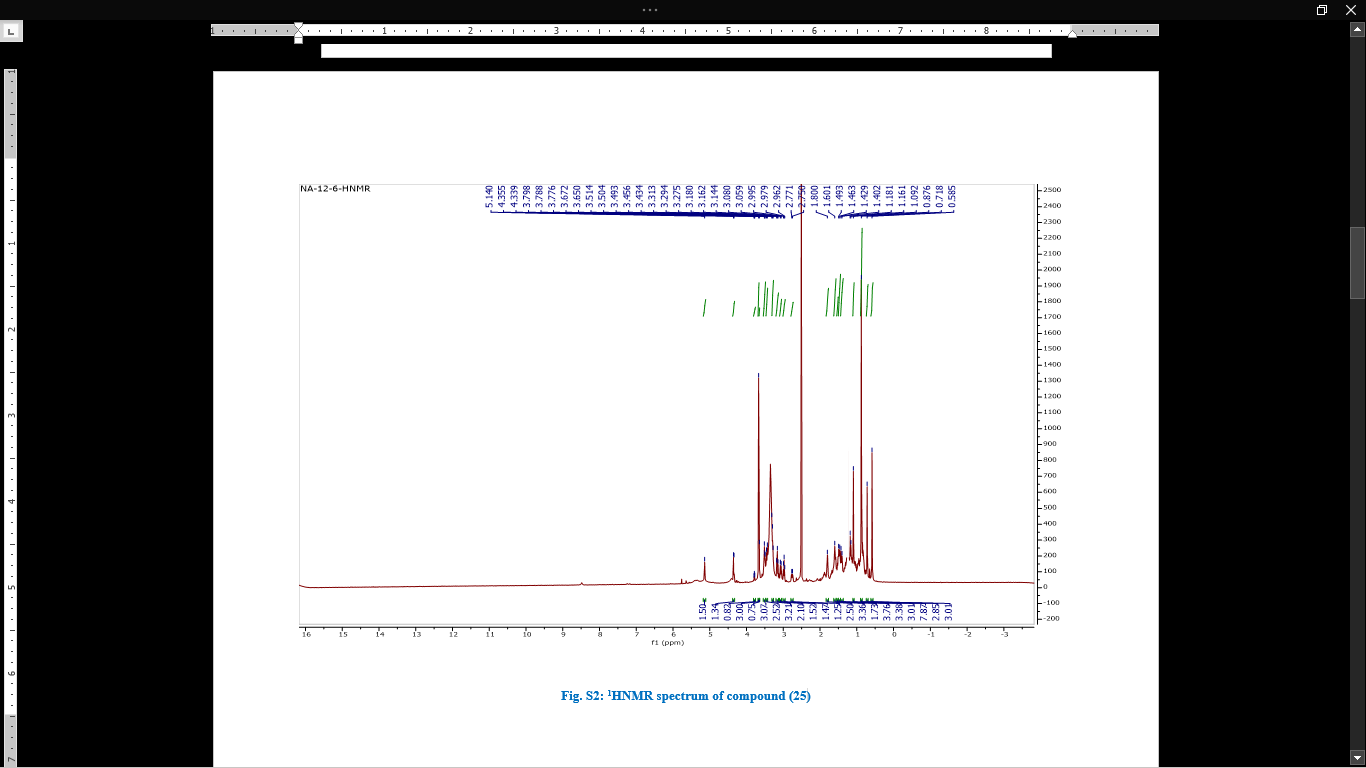


Fig. S51HNMR spectrum of compound (33)


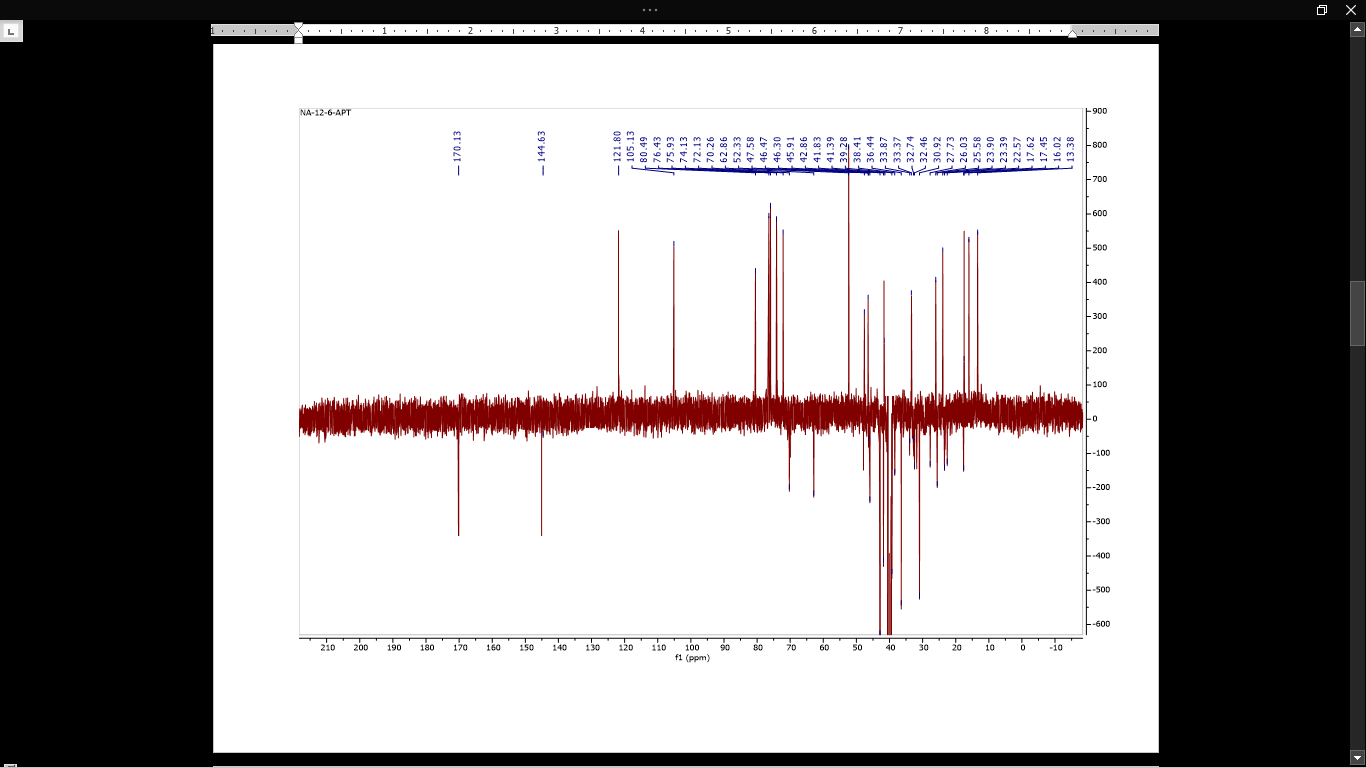


Fig. S6 DEPTQ-135 spectrum of compound (33)


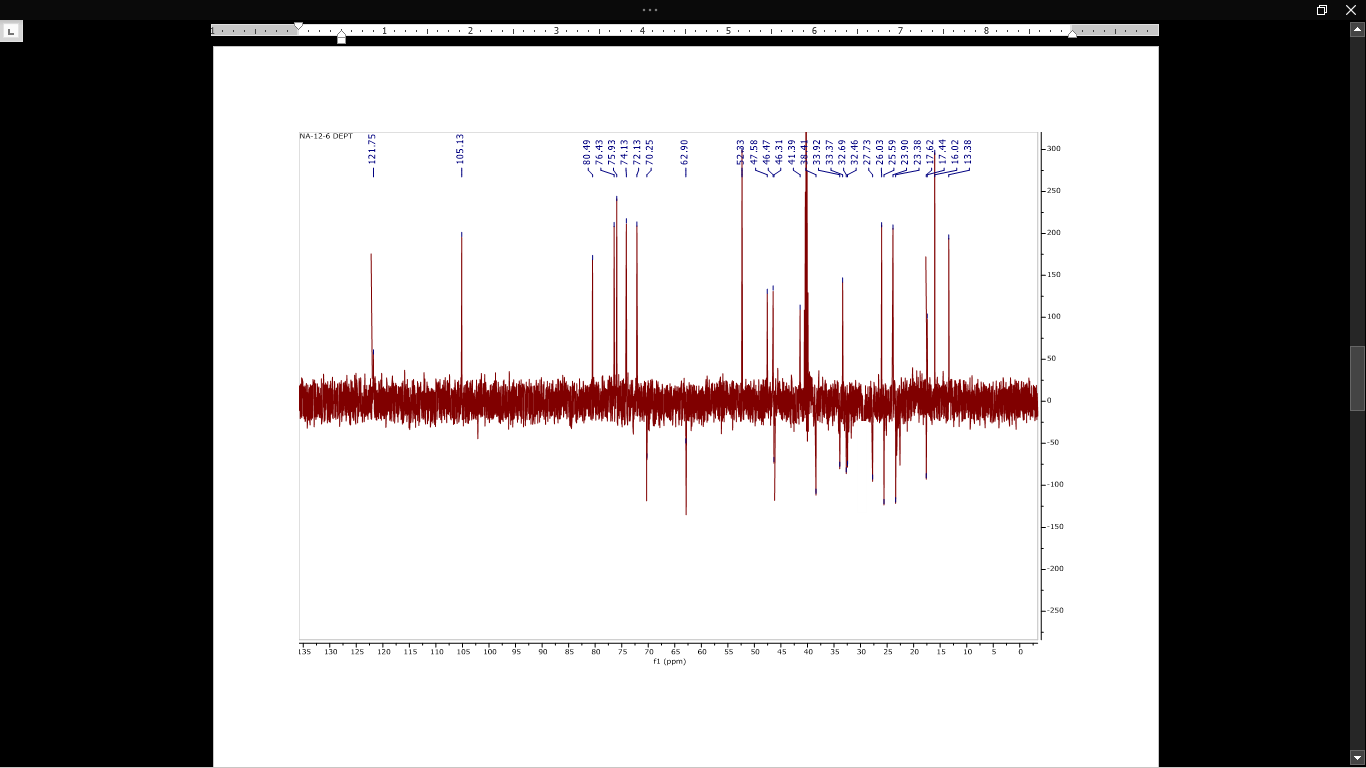


Fig. S7 DEPT-135 spectrum of compound (33)


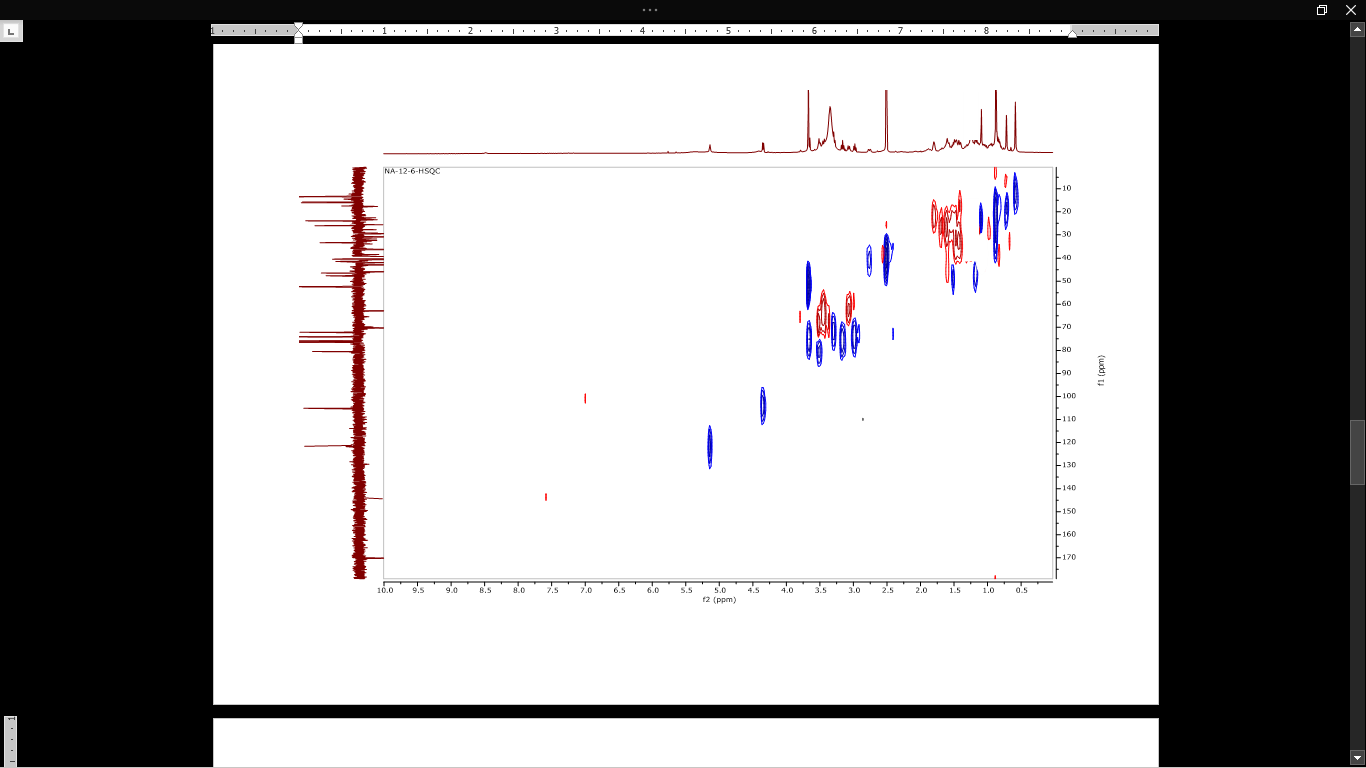


Fig. S8 HSQC spectrum of compound (33)


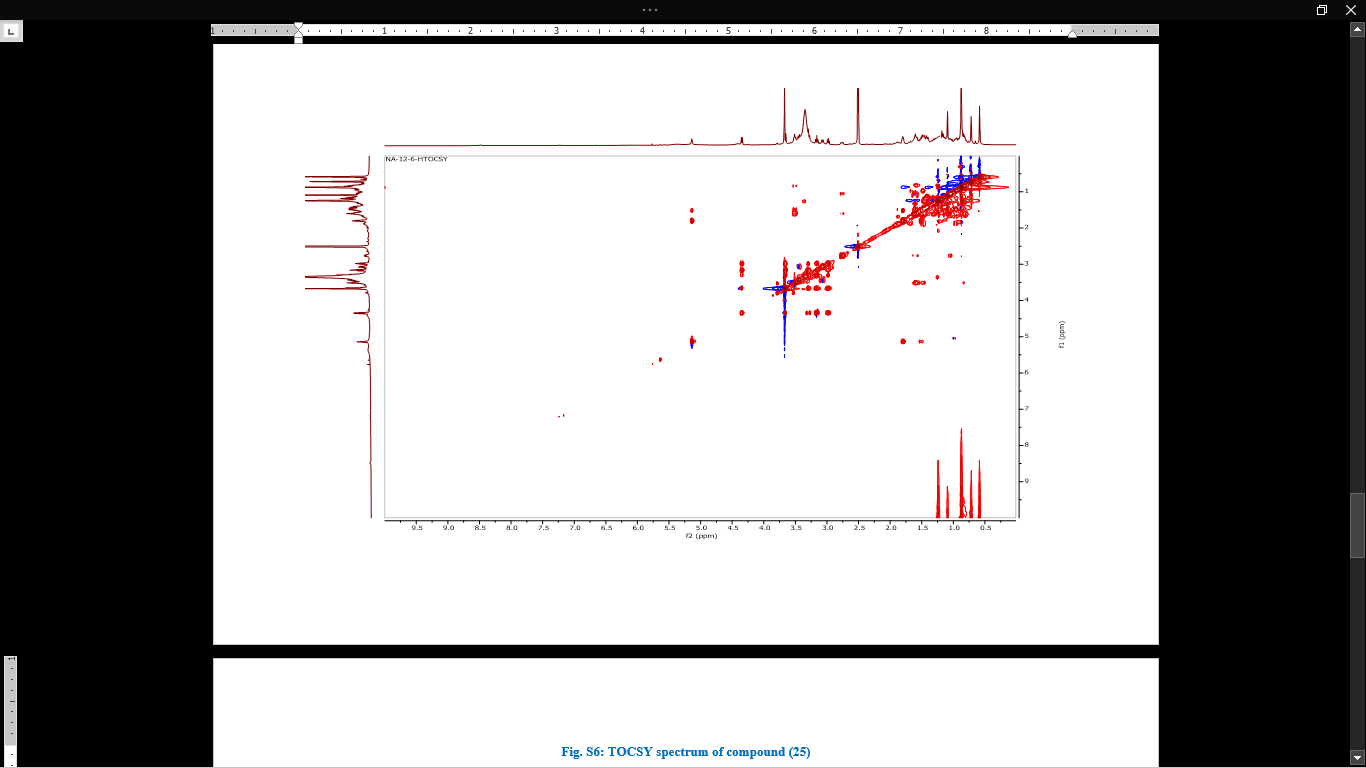


Fig. S9 TOCSY spectrum of compound (33)


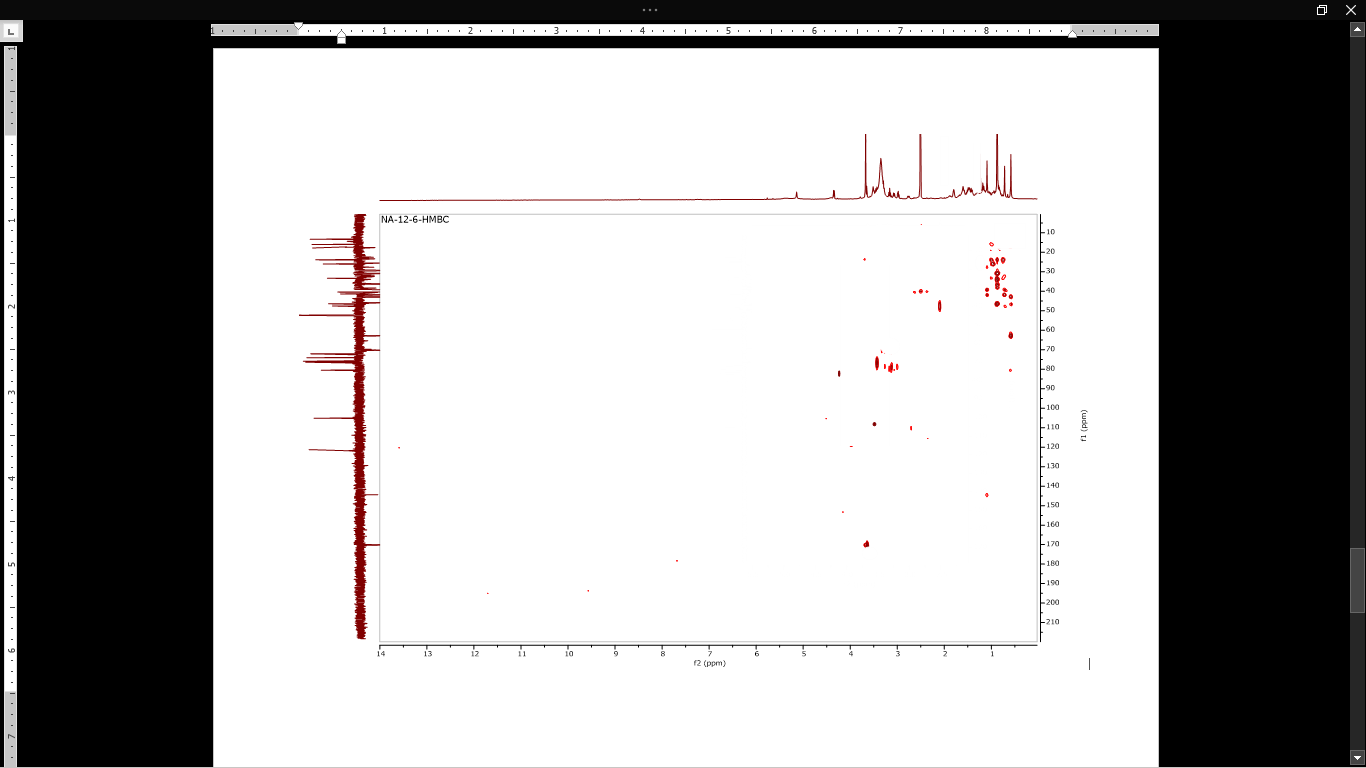


Fig. S10 HMBC spectrum of compound (33)


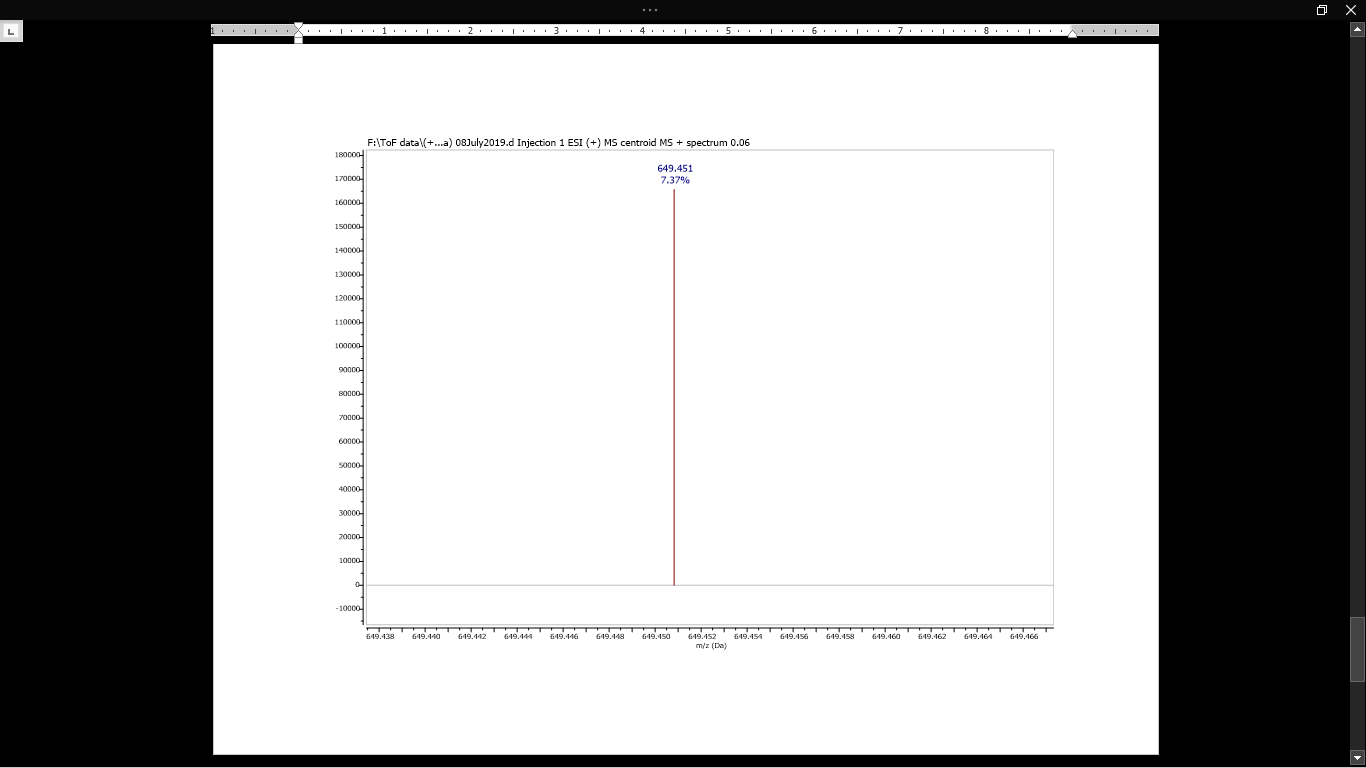


Fig. S11 ESI (-) MS spectrum of Compound (33)


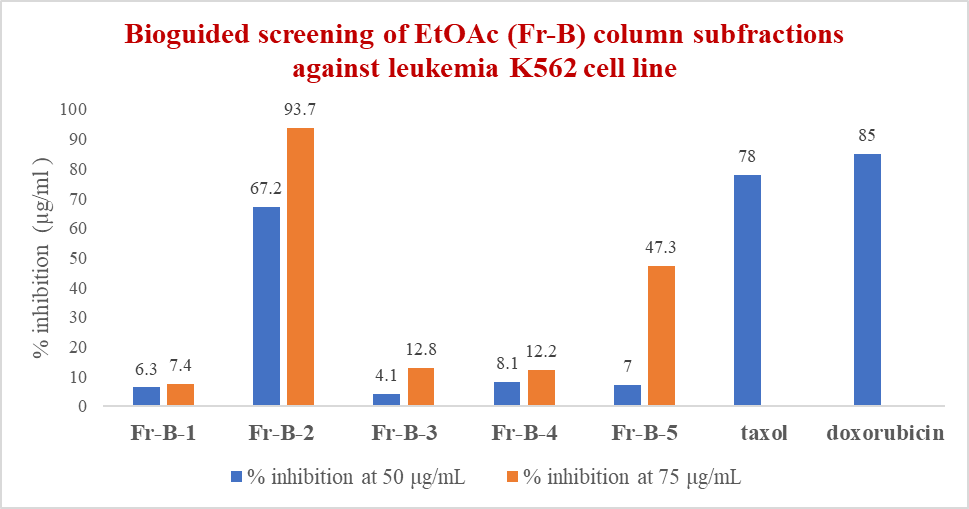


**Fig.S12 Bioguided screening of EtOAc (Fr-B) column subfractions against leukemia K562 cell line.**


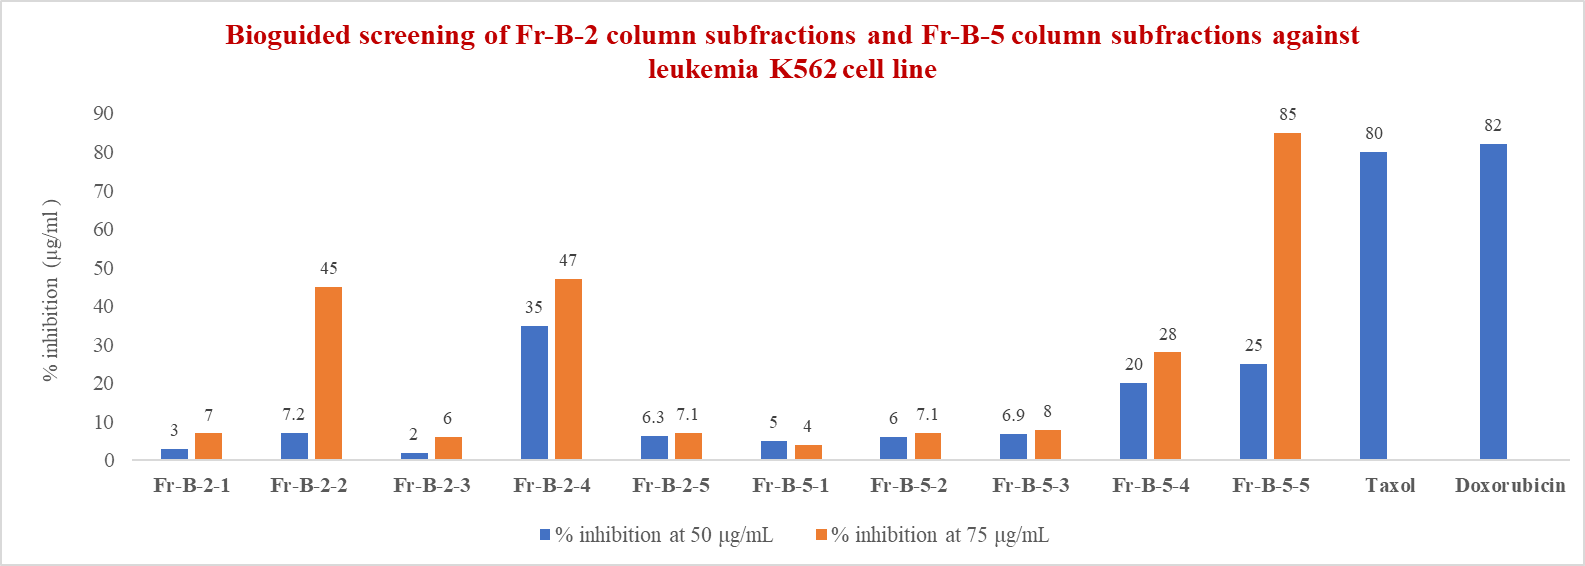


**Fig.S13: Bioguided screening of Fr-B-2 column subfractions and Fr-B-5 column subfractions against leukemia K562 cell line**

**
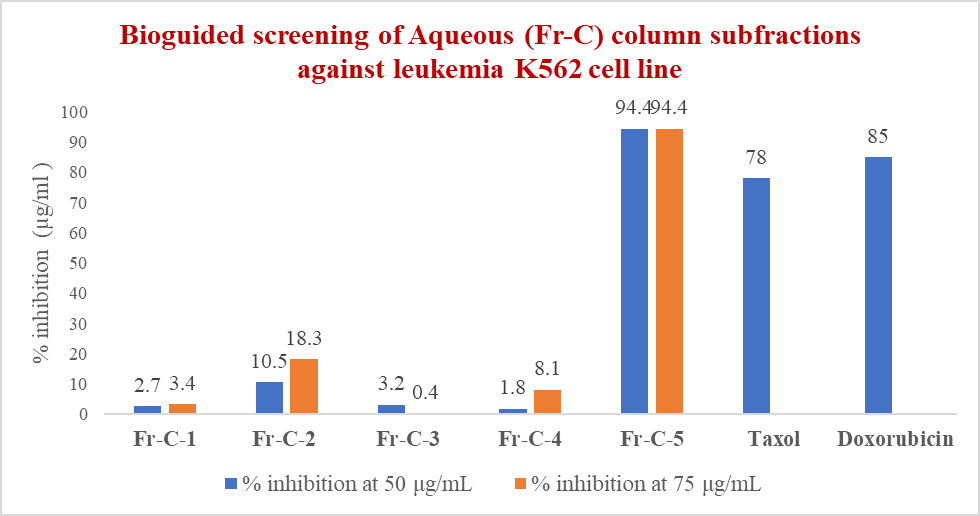
**

**Fig.S14: Bioguided screening of Aqueous (Fr-C) column subfractions against leukemia K562 cell line.**


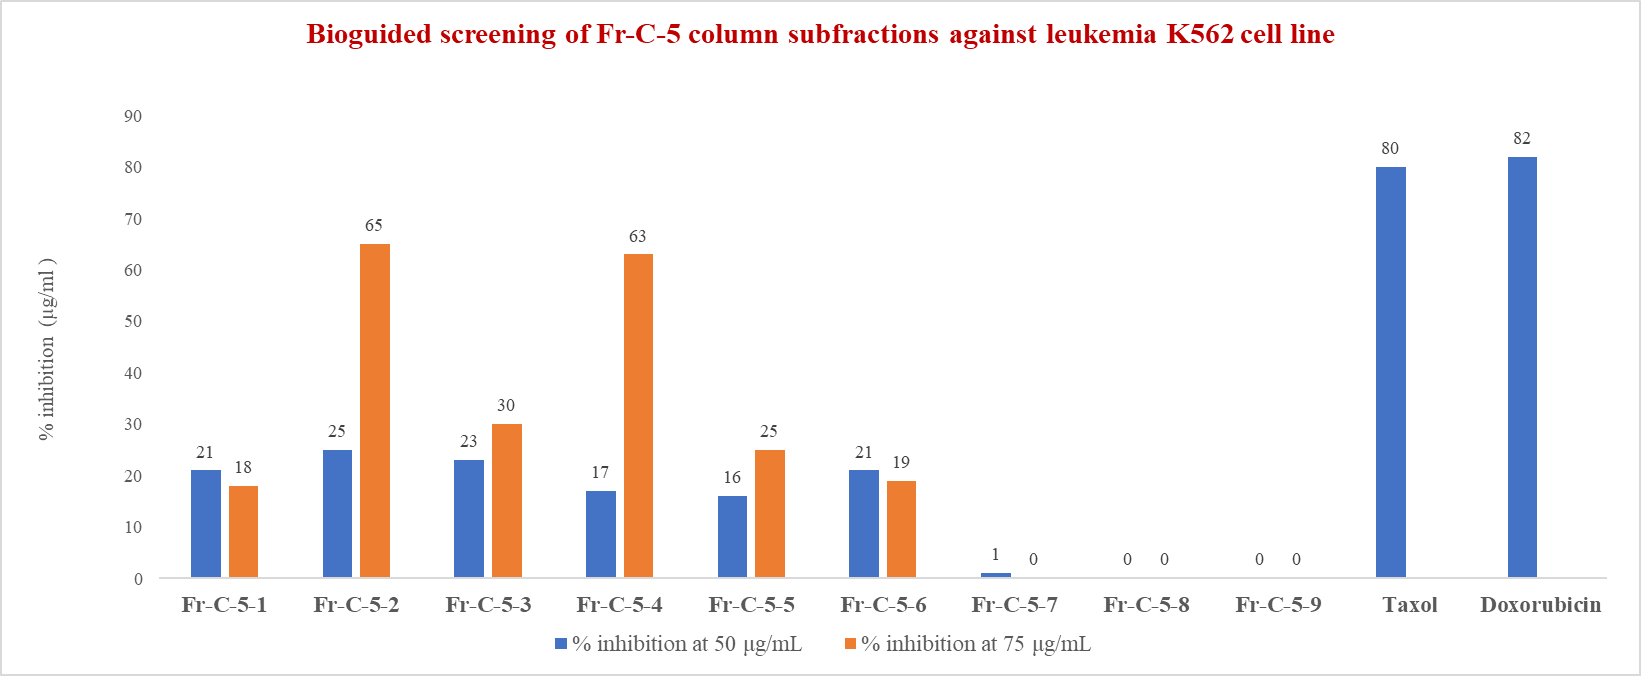


**Fig.S15: Bioguided screening of Fr-C-5 column subfractions against leukemia K562 cell line.**

**References**

[1] D. Arigoni *et al.*, "Dimethylallyl pyrophosphate is not the committed precursor of isopentenyl pyrophosphate during terpenoid biosynthesis from 1-deoxyxylulose in higher plants," *Proceedings of the National Academy of Sciences,* vol. 96, no. 4, pp. 1309-1314, 1999.

[2] P. Jain, S. Bari, and S. Surana, "Isolation of stigmasterol and γ-sitosterol from petroleum ether extract of woody stem of Abelmoschus manihot," *Asian journal of biological sciences,* vol. 2, no. 4, pp. 112-117, 2009.

[3] Y. Zhu *et al.*, "Pentacyclic Triterpenes from the resin of Liquidambar formosana have anti-angiogenic properties," *Phytochemistry,* vol. 184, p. 112676, 2021.

[4] G. R. Mallavarapu and E. Muralikrishna, "Maslinic lactone from the heartwood of Terminalia alata," *J. Nat. Prod.,* 10.1021/np50030a017 vol. 46, no. 6, pp. 930-1, // 1983, doi: 10.1021/np50030a017.

[5] M. A. Hossain and Z. Ismail, "Isolation and characterization of triterpenes from the leaves of Orthosiphon stamineus," *Arabian Journal of Chemistry,* vol. 6, no. 3, pp. 295-298, 2013.

[6] Q. Fu, L. Qiu, H.-M. Yuan, T. Yu, and L. Zou, "Paeonenoides D and E: Two new nortriterpenoids from Paeonia lactiflora and their inhibitory activities on NO production," *Helv. Chim. Acta,* 10.1002/hlca.201500130 vol. 99, no. 1, pp. 46-49, // 2016, doi: 10.1002/hlca.201500130.

[7] L. Fu *et al.*, "Three New Triterpenes from Nerium oleander and Biological Activity of the Isolated Compounds," *J. Nat. Prod.,* 10.1021/np040072u vol. 68, no. 2, pp. 198-206, // 2005, doi: 10.1021/np040072u.

[8] S. K. Nigam, G. Misra, and C. R. Mitra, "Stigmasterol glucoside a constituent of Adenanthera pavonina seed and leaf," (in eng), *Planta Med,* vol. 23, no. 2, pp. 145-8, Mar 1973, doi: 10.1055/s-0028-1099425.

[9] R. Eyanagi, Y. Hisanari, and H. Shigematsu, "Studies of paracetamol/phenacetin toxicity: isolation and characterization of p-aminophenol-glutathione conjugate," (in eng), *Xenobiotica,* vol. 21, no. 6, pp. 793-803, Jun 1991, doi: 10.3109/00498259109039518.

[10] K. R. Markham and B. Ternai, "Carbon-13 NMR of flavonoids. II. Flavonoids other than flavone and flavonol aglycons," *Tetrahedron,* 10.1016/0040-4020(76)88036-2 vol. 32, no. 21, pp. 2607-12, // 1976, doi: 10.1016/0040-4020(76)88036-2.

[11] M. Kalegari *et al.*, "Phytochemical constituents and preliminary toxicity evaluation of leaves from Rourea induta Planch.(Connaraceae)," *Brazilian Journal of Pharmaceutical Sciences,* vol. 47, no. 3, pp. 635-642, 2011.

[12] I. Dini, G. Carlo Tenore, and A. Dini, "Phenolic constituents of Kancolla seeds," *Food Chemistry,* vol. 84, no. 2, pp. 163-168, 2004/02/01/ 2004, doi: <https://doi.org/10.1016/S0308-8146(03)00185-7>.

[13] F. Ferreres, D. M. Pereira, P. Valentão, P. B. Andrade, R. M. Seabra, and M. Sottomayor, "New Phenolic Compounds and Antioxidant Potential of Catharanthus roseus," *Journal of Agricultural and Food Chemistry,* vol. 56, no. 21, pp. 9967-9974, 2008/11/12 2008, doi: 10.1021/jf8022723.

[14] N. Morita, M. Arisawa, M. Nagase, H. Hsu, and Y. Chen, "Studies on the constituents of formosan leguminosae. I. The constituents in the leaves of Clitoria ternatea L," *Journal,* 1977.

[15] R. S. Mohammed, A. H. Abou Zeid, E. A. El-Kashoury, A. A. Sleem, and D. A. Waly, "A new flavonol glycoside and biological activities of Adenanthera pavonina L. leaves," *Nat. Prod. Res.,* 10.1080/14786419.2013.856903 vol. 28, no. 5, pp. 282-289, // 2014, doi: 10.1080/14786419.2013.856903.

[16] G. C. Kite, E. R. Rowe, G. P. Lewis, and N. C. Veitch, "Acylated flavonol tri- and tetraglycosides in the flavonoid metabolome of Cladrastis kentukea (Leguminosae)," *Phytochemistry,* vol. 72, no. 4, pp. 372-384, 2011/04/01/ 2011, doi: <https://doi.org/10.1016/j.phytochem.2010.12.017>.

[17] H. H. F. Koolen, E. R. Soares, F. M. A. da Silva, A. Q. L. de Souza, E. Rodrigues Filho, and A. D. L. de Souza, "Triterpenes and flavonoids from the roots of Mauritia flexuosa," *Rev. Bras. Farmacogn.,* 10.1590/S0102-695X2011005000201 vol. 22, no. 1, pp. 189-192, // 2012, doi: 10.1590/S0102-695X2011005000201.

[18] W. Seebacher, N. Simic, R. Weis, R. Saf, and O. Kunert, "Complete assignments of 1H and 13C NMR resonances of oleanolic acid, 18α‐oleanolic acid, ursolic acid and their 11‐oxo derivatives," *J Magnetic Resonance in Chemistry,* vol. 41, no. 8, pp. 636-638, 2003.

[19] C.-K. Lee, "Ursane triterpenoids from leaves of Melaleuca leucadendron," *J Phytochemistry,* vol. 49, no. 4, pp. 1119-1122, 1998.

[20] A. Hamed *et al.*, "Diverse polyketides and alkaloids from Penicillium sp. KHMM: structural elucidation, biological and molecular docking studies," (in eng), *Z Naturforsch C J Biosci,* vol. 74, no. 5-6, pp. 131-137, May 27 2019, doi: 10.1515/znc-2018-0145.

[21] S. Srivastava and D. Jain, "Triterpenoid saponins from plants of Araliaceae," *J Phytochemistry,* vol. 28, no. 2, pp. 644-647, 1989.

[22] R. González-Laredo, M. F. De La Hoya, M. Quintero-Ramos, and J. Karchesy, "Flavonoid and cyanogenic contents of chaya (spinach tree)," *Plant Foods for Human Nutrition,* vol. 58, no. 3, pp. 1-8, 2003.

[23] A. M. El-Hawiet, S. M. Toaima, A. M. Asaad, M. M. Radwan, and N. A. El-Sebakhy, "Chemical constituents from Astragalus annularis Forssk. and A. trimestris L., Fabaceae," *J Revista Brasileira de Farmacognosia,* vol. 20, no. 6, pp. 860-865, 2010.

[24] A. Ikuta, H. Tomiyasu, Y. Morita, and K. Yoshimura, "Ursane-and Oleanane-Type Triterpenes from Ternstroemia g ymnanthera Callus Tissues," *J Journal of natural products,* vol. 66, no. 8, pp. 1051-1054, 2003.

[25] B. Joshi, K. Singh, and R. Roy, "Complete assignments of 1H and 13C NMR spectra of the pentacyclic triterpene hederagenin from Nigella sativa Linn," *Magnetic resonance in chemistry,* vol. 37, no. 4, pp. 295-298, 1999.

[26] D. Zhang *et al.*, "Triterpenoids and their glycosides from Glinus oppositifolius with antifungal activities against Microsporum gypseum and Trichophyton rubrum," *Molecules,* vol. 24, no. 12, p. 2206, 2019.

[27] N. Das, P. Chandran, and S. Chakraborty, "Potent spermicidal effect of oleanolic acid 3-beta-D-glucuronide, an active principle isolated from the plant Sesbania sesban Merrill," *J Contraception,* vol. 83, no. 2, pp. 167-175, 2011.

[28] T.-D. Lin and J. Shoji, "Studies on the constituents of Panacis japonici rhizoma. VI. The structure of Chikusetsusaponin II, IVc," *J. Chin. Chem. Soc. (Taipei),* 10.1002/jccs.197900007 vol. 26, no. 1, pp. 29-35, // 1979, doi: 10.1002/jccs.197900007.
